# Supplementary material
Source: PubMed Central journal article supplement (PMC6051921)
Supplement: NIHMS968750-supplement-1.pdf [file NIHMS968750-supplement-1.pdf]

## Supplemental Materials

|                                 |                  |                   |                           |                  |                   |
|---------------------------------|------------------|-------------------|---------------------------|------------------|-------------------|
| Resting membrane potential (mV) | Control          | -48.5 ± 2.0 (21)  | Spontaneous activity (Hz) | Control          | 2.0 ± 0.3 (15)    |
|                                 | 10 nM Aβ acute   | -48.2 ± 2.4 (16)  |                           | 10 nM Aβ acute   | 1.4 ± 0.2 (13)    |
|                                 | 10 nM Aβ chronic | -44.9 ± 1.4 (32)  |                           | 10 nM Aβ chronic | *0.2 ± 0.2 (17)   |
|                                 | 5 μM Aβ acute    | *-43.5 ± 1.3 (23) |                           | 5 μM Aβ acute    | **0.0 ± 0.7 (21)  |
| Membrane resistance (MΩ)        | Control          | 531 ± 89 (22)     | FWHM (ms)                 | Control          | 2.7 ± 0.2 (28)    |
|                                 | 10 nM Aβ acute   | 442 ± 51 (16)     |                           | 10 nM Aβ acute   | 2.0 ± 0.2 (11)    |
|                                 | 10 nM Aβ chronic | 488 ± 35 (32)     |                           | 10 nM Aβ chronic | 2.5 ± 0.2 (23)    |
|                                 | 5 μM Aβ acute    | 451 ± 103 (31)    |                           | 5 μM Aβ acute    | *3.8 ± 0.4 (22)   |
| Membrane capacitance (pF)       | Control          | 26.6 ± 2.4 (22)   | Rise time (ms)            | Control          | 2.9 ± 0.1 (28)    |
|                                 | 10 nM Aβ acute   | 26.0 ± 2.2 (16)   |                           | 10 nM Aβ acute   | 2.8 ± 0.1 (11)    |
|                                 | 10 nM Aβ chronic | 27.8 ± 1.8 (32)   |                           | 10 nM Aβ chronic | 3.0 ± 0.1 (23)    |
|                                 | 5 μM Aβ acute    | 33.5 ± 2.0 (31)   |                           | 5 μM Aβ acute    | *3.5 ± 0.2 (22)   |
| Maximum inward current (pA)     | Control          | -3802 ± 403 (22)  | V <sub>max</sub> (mV/ms)  | Control          | 119.8 ± 8.8 (31)  |
|                                 | 10 nM Aβ acute   | -2855 ± 329 (13)  |                           | 10 nM Aβ acute   | 132.2 ± 10.5 (16) |
|                                 | 10 nM Aβ chronic | -2802 ± 241 (30)  |                           | 10 nM Aβ chronic | 125.9 ± 12.6 (24) |
|                                 | 5 μM Aβ acute    | *-1874 ± 179 (30) |                           | 5 μM Aβ acute    | *82.4 ± 6.0 (24)  |
| Maximum outward current (pA)    | Control          | 1965 ± 177 (22)   | Decay slope (mV/ms)       | Control          | 2.3 ± 0.1 (31)    |
|                                 | 10 nM Aβ acute   | 1573 ± 184 (13)   |                           | 10 nM Aβ acute   | 2.8 ± 0.2 (16)    |
|                                 | 10 nM Aβ chronic | 1551 ± 134 (30)   |                           | 10 nM Aβ chronic | 2.2 ± 0.1 (24)    |
|                                 | 5 μM Aβ acute    | *1324 ± 203 (30)  |                           | 5 μM Aβ acute    | 0.0 ± 0.7 (21)    |
| AP amplitude (mV)               | Control          | 105.3 ± 4.2 (18)  | Decay time (ms)           | Control          | 5.2 ± 1.0 (31)    |
|                                 | 10 nM Aβ acute   | 102.5 ± 2.7 (14)  |                           | 10 nM Aβ acute   | 3.1 ± 1.1 (16)    |
|                                 | 10 nM Aβ chronic | 107.9 ± 2.9 (22)  |                           | 10 nM Aβ chronic | 3.9 ± 0.9 (23)    |
|                                 | 5 μM Aβ acute    | *101.1 ± 7.8 (20) |                           | 5 μM Aβ acute    | 2.9 ± 0.6 (24)    |

**Supplemental Table 1.** Data shown as mean values ± SE (no. cells analyzed). One-way analysis of variance (ANOVA) tests were performed as described in Materials and Methods. \*Significant difference at  $p < 0.05$ ; \*\*Significant difference at  $p < 0.001$ .

| Vendor            | Component                   | Catalog # | Quantity       |
|-------------------|-----------------------------|-----------|----------------|
| Invitrogen        | Neurobasal®-A               | 10888     | 500 mL         |
| Invitrogen        | B-27®                       | 17504-044 | 1x             |
| Invitrogen        | GlutaMAX™                   | 35050-061 | 1x             |
| Invitrogen        | Antibiotic/Antimycotic      | 15240-096 | 1%             |
| Cell Sciences     | BDNF, recombinant human     | CRB600B   | 20 ng/mL       |
| Cell Sciences     | NT-3, recombinant human     | CRN500B   | 20 ng/mL       |
| Sigma             | Insulin-like Growth Factor  | I2656     | 20 ng/mL       |
| Fisher Scientific | Adjust osmolarity with NaCl | S671-3    | 297 mOsm final |

**Supplemental Table 2.** HSL1 medium was designed to promote the long-term survival and maturation of hippocampal neurons *in vitro*.

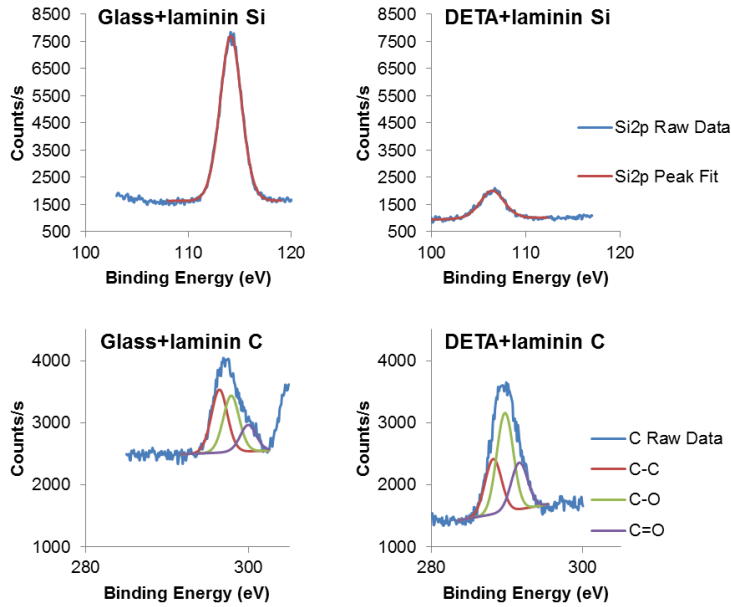

**Supplemental Figure 1. XPS analysis of laminin on glass vs. laminin on DETA.** XPS analysis of laminin on DETA-modified glass and unmodified glass. The carbonyl peak, which is indicative of protein for these samples, is smaller on glass than on DETA-modified glass relative to the underlying substrate (Si).

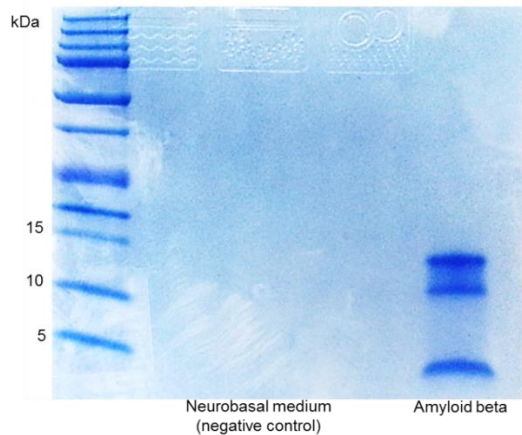

**Supplemental Figure 2. Amyloid beta oligomerization gel electrophoresis and coomassie blue stain.** Pure oligomerized samples of Aβ were run on 10-20% tris-tricine gels and stained to visualize protein bands. Only low molecular weight bands were present.
